# Supplementary material
Source: ML conference proceedings conference paper supplement (https://proceedings.mlr.press/v84/liu18a.html)
Supplement: Supplementary file [file liu18a-supp.pdf]

---

# Supplementary Material for *Zeroth-Order Online Alternating Direction Method of Multipliers: Convergence Analysis and Applications*

---

|                                                                       |                                                                    |                                                         |                                                 |
|-----------------------------------------------------------------------|--------------------------------------------------------------------|---------------------------------------------------------|-------------------------------------------------|
| <b>Sijia Liu</b><br>University of Michigan<br>IBM Research, Cambridge | <b>Jie Chen</b><br>Northwestern Polytechnical<br>University, China | <b>Pin-Yu Chen</b><br>IBM Research,<br>Yorktown Heights | <b>Alfred O. Hero</b><br>University of Michigan |
|-----------------------------------------------------------------------|--------------------------------------------------------------------|---------------------------------------------------------|-------------------------------------------------|

## 1 Assumptions and Key Notations

Recall that we consider the regularized loss minimization problem over a time horizon of length  $T$ ,

$$\begin{aligned}
 & \underset{\mathbf{x} \in \mathcal{X}, \mathbf{y} \in \mathcal{Y}}{\text{minimize}} && \frac{1}{T} \sum_{t=1}^T f_t(\mathbf{x}; \mathbf{w}_t) + \phi(\mathbf{y}) \\
 & \text{subject to} && \mathbf{Ax} + \mathbf{By} = \mathbf{c}.
 \end{aligned} \tag{1}$$

ZOO-ADMM is given by

$$\mathbf{x}_{t+1} = \arg \min_{\mathbf{x} \in \mathcal{X}} \left\{ \tilde{\mathbf{g}}_t^T \mathbf{x} - \boldsymbol{\lambda}_t^T (\mathbf{Ax} + \mathbf{By}_t - \mathbf{c}) + \frac{\rho}{2} \|\mathbf{Ax} + \mathbf{By}_t - \mathbf{c}\|_2^2 + \frac{1}{2\eta_t} \|\mathbf{x} - \mathbf{x}_t\|_{\mathbf{G}_t}^2 \right\}, \tag{2}$$

$$\mathbf{y}_{t+1} = \arg \min_{\mathbf{y} \in \mathcal{Y}} \left\{ \phi(\mathbf{y}) - \boldsymbol{\lambda}_t^T (\mathbf{Ax}_{t+1} + \mathbf{By} - \mathbf{c}) + \frac{\rho}{2} \|\mathbf{Ax}_{t+1} + \mathbf{By} - \mathbf{c}\|_2^2 \right\}, \tag{3}$$

$$\boldsymbol{\lambda}_{t+1} = \boldsymbol{\lambda}_t - \rho(\mathbf{Ax}_{t+1} + \mathbf{By}_{t+1} - \mathbf{c}), \tag{4}$$

where  $\mathbf{G}_t = \alpha \mathbf{I} - \rho \eta_t \mathbf{A}^T \mathbf{A}$ .

We first elaborate on our assumptions.

- Assumption A implies that  $\|\mathbf{x} - \mathbf{x}'\|_2 \leq R$  and  $\|\mathbf{y} - \mathbf{y}'\|_2 \leq R$  for all  $\mathbf{x}, \mathbf{x}' \in \mathcal{X}$  and for all  $\mathbf{y}, \mathbf{y}' \in \mathcal{Y}$ .
- Based on Jensen's inequality, Assumptions B implies that  $\|\mathbb{E}[\nabla_{\mathbf{x}} f(\mathbf{x}; \mathbf{w}_t)]\|_2 \leq L_1$ .
- Assumption C implies a Lipschitz condition over the gradient  $\nabla_{\mathbf{x}} f(\mathbf{x}; \mathbf{w}_t)$  with constant  $L_g(\mathbf{w}_t)$  (Bubeck et al., 2015; Hazan, 2016). Also based on Jensen's inequality, we have  $|\mathbb{E}[L_g(\mathbf{w}_t)]| \leq L_g$ .

We next introduce key notations used in our analysis. Given the primal-dual variables  $\mathbf{x}$ ,  $\mathbf{y}$  and  $\boldsymbol{\lambda}$  of problem (1), we define  $\mathbf{v} := [\mathbf{x}^T, \mathbf{y}^T, \boldsymbol{\lambda}^T]$ , and a primal-dual mapping  $H$

$$H(\mathbf{v}) := \mathbf{Cv} - \begin{bmatrix} 0 \\ 0 \\ \mathbf{c} \end{bmatrix}, \quad \mathbf{C} := \begin{bmatrix} 0 & 0 & -\mathbf{A}^T \\ 0 & 0 & -\mathbf{B}^T \\ \mathbf{A} & \mathbf{B} & 0 \end{bmatrix}, \tag{5}$$

where  $\mathbf{C}$  is skew symmetric, namely,  $\mathbf{C}^T = -\mathbf{C}$ . An important property of the affine mapping  $H$  is that  $\langle \mathbf{v}_1 - \mathbf{v}_2, H(\mathbf{v}_1) - H(\mathbf{v}_2) \rangle = 0$  for every  $\mathbf{v}_1$  and  $\mathbf{v}_2$ . Supposing the sequence  $\{\mathbf{v}_t\}$  is generated by an algorithm, we introduce the auxiliary sequence

$$\tilde{\mathbf{v}}_t := [\mathbf{x}_t^T, \mathbf{y}_t^T, \tilde{\boldsymbol{\lambda}}_t^T]^T, \tag{6}$$

where  $\tilde{\boldsymbol{\lambda}}_t := \boldsymbol{\lambda}_t - \rho(\mathbf{Ax}_{t+1} + \mathbf{By}_t - \mathbf{c})$ .

## 2 Proof of Theorem 1

Since the sequences  $\{\mathbf{x}_t\}$ ,  $\{\mathbf{y}_t\}$  and  $\{\boldsymbol{\lambda}_t\}$  produced from (2)-(4) have the same structure as the ADMM/O-ADMM steps, the property of ADMM given by Theorem 4 of (Suzuki, 2013) is directly applicable to our case, yielding

$$\begin{aligned}
 & \sum_{t=1}^T (f_t(\mathbf{x}_t) + \phi(\mathbf{y}_t)) - \sum_{t=1}^T (f_t(\mathbf{x}) + \phi(\mathbf{y})) + \sum_{t=1}^T (\tilde{\mathbf{v}}_t - \mathbf{v})^T H(\tilde{\mathbf{v}}_t) \\
 \leq & \frac{\|\mathbf{x}_1 - \mathbf{x}\|_{\mathbf{G}_1}^2}{2\eta_1} + \sum_{t=2}^T \left( \frac{\|\mathbf{x}_t - \mathbf{x}\|_{\mathbf{G}_t}^2}{2\eta_t} - \frac{\|\mathbf{x}_t - \mathbf{x}\|_{\mathbf{G}_{t-1}}^2}{2\eta_{t-1}} \right) + \langle \boldsymbol{\lambda}, \mathbf{A}(\mathbf{x}_{T+1} - \mathbf{x}_1) \rangle \\
 & + \frac{\rho}{2} \|\mathbf{y}_1 - \mathbf{y}\|_{\mathbf{B}^T \mathbf{B}} + \frac{\|\boldsymbol{\lambda}_1 - \boldsymbol{\lambda}\|_2^2}{2\rho} - \frac{\|\boldsymbol{\lambda}_{T+1} - \boldsymbol{\lambda}\|_2^2}{2\rho} + \langle \mathbf{B}(\mathbf{y} - \mathbf{y}_{T+1}), \boldsymbol{\lambda}_{T+1} - \boldsymbol{\lambda} \rangle \\
 & - \langle \mathbf{B}(\mathbf{y} - \mathbf{y}_1), \boldsymbol{\lambda}_1 - \boldsymbol{\lambda} \rangle - \sum_{t=1}^T \frac{\|\boldsymbol{\lambda}_t - \boldsymbol{\lambda}_{t+1}\|_2^2}{2\rho} - \sum_{t=1}^T \frac{\sigma}{2} \|\mathbf{x}_t - \mathbf{x}\|_2^2 + \sum_{t=1}^T \frac{\eta_t}{2} \|\hat{\mathbf{g}}_t\|_{\mathbf{G}_t^{-1}}^2. \tag{7}
 \end{aligned}$$

Here for notational simplicity we have used, and henceforth will continue to use,  $f_t(\mathbf{x}_t)$  instead of  $f(\mathbf{x}_t; \mathbf{w}_t)$ .

In (7), based on  $\mathbf{G}_t = \alpha \mathbf{I} - \rho \eta_t \mathbf{A}^T \mathbf{A}$ , we have

$$\frac{\|\mathbf{x}_t - \mathbf{x}\|_{\mathbf{G}_t}^2}{2\eta_t} - \frac{\|\mathbf{x}_t - \mathbf{x}\|_{\mathbf{G}_{t-1}}^2}{2\eta_{t-1}} = \left( \frac{\alpha}{2\eta_t} - \frac{\alpha}{2\eta_{t-1}} \right) \|\mathbf{x}_t - \mathbf{x}\|_2^2,$$

which yields

$$\sum_{t=2}^T \left( \frac{\|\mathbf{x}_t - \mathbf{x}\|_{\mathbf{G}_t}^2}{2\eta_t} - \frac{\|\mathbf{x}_t - \mathbf{x}\|_{\mathbf{G}_{t-1}}^2}{2\eta_{t-1}} \right) - \sum_{t=1}^T \frac{\sigma}{2} \|\mathbf{x}_t - \mathbf{x}\|_2^2 \leq \sum_{t=2}^T \max\left\{ \frac{\alpha}{2\eta_t} - \frac{\alpha}{2\eta_{t-1}} - \frac{\sigma}{2}, 0 \right\} R^2. \tag{8}$$

We also note that the terms  $\frac{1}{2\eta_1} \|\mathbf{x}_1 - \mathbf{x}\|_{\mathbf{G}_1}^2$ ,  $\langle \boldsymbol{\lambda}, \mathbf{A}(\mathbf{x}_{T+1} - \mathbf{x}_1) \rangle$ ,  $\frac{\rho}{2} \|\mathbf{y}_1 - \mathbf{y}\|_{\mathbf{B}^T \mathbf{B}}$ ,  $\frac{1}{2\rho} (\|\boldsymbol{\lambda}_1 - \boldsymbol{\lambda}\|_2^2 - \|\boldsymbol{\lambda}_{T+1} - \boldsymbol{\lambda}\|_2^2)$ ,  $\langle \mathbf{B}(\mathbf{y} - \mathbf{y}_{T+1}), \boldsymbol{\lambda}_{T+1} - \boldsymbol{\lambda} \rangle$ , and  $\langle \mathbf{B}(\mathbf{y} - \mathbf{y}_1), \boldsymbol{\lambda}_1 - \boldsymbol{\lambda} \rangle$  are *independent* of time  $t$ . In particular, we have

$$\begin{aligned}
 \|\mathbf{x}_1 - \mathbf{x}\|_{\mathbf{G}_1}^2 & \leq \alpha R^2, \quad \langle \boldsymbol{\lambda}, \mathbf{A}(\mathbf{x}_{T+1} - \mathbf{x}_1) \rangle \leq R \|\boldsymbol{\lambda}\|_2 \|\mathbf{A}\|_F, \\
 (\|\boldsymbol{\lambda}_1 - \boldsymbol{\lambda}\|_2^2 - \|\boldsymbol{\lambda}_{T+1} - \boldsymbol{\lambda}\|_2^2) & \leq \|\boldsymbol{\lambda}\|_2^2, \quad \langle \mathbf{B}(\mathbf{y} - \mathbf{y}_1), \boldsymbol{\lambda}_1 - \boldsymbol{\lambda} \rangle \leq R \|\mathbf{B}\|_F \|\boldsymbol{\lambda}\|_2,
 \end{aligned} \tag{9}$$

where  $\|\cdot\|_F$  denotes the Frobenius norm of a matrix, and we have used the facts that  $\mathbf{G}_t \preceq \alpha \mathbf{I}$  and  $\boldsymbol{\lambda}_1 = \mathbf{0}$ .

Based on the optimality condition of  $\mathbf{y}_{t+1}$  in (3), we have

$$\langle \partial\phi(\mathbf{y}_{t+1}) - \mathbf{B}^T \boldsymbol{\lambda}_t + \rho \mathbf{B}^T (\mathbf{A} \mathbf{x}_{t+1} + \mathbf{B} \mathbf{y}_{t+1} - \mathbf{c}), \mathbf{y} - \mathbf{y}_{t+1} \rangle \geq 0, \forall \mathbf{y} \in \mathcal{Y},$$

which is equivalent to  $\langle \partial\phi(\mathbf{y}_{t+1}) - \mathbf{B}^T \boldsymbol{\lambda}_{t+1}, \mathbf{y} - \mathbf{y}_{t+1} \rangle \geq 0$ . And thus, we obtain

$$\langle \boldsymbol{\lambda}_{t+1}, \mathbf{B}(\mathbf{y} - \mathbf{y}_{t+1}) \rangle - \langle \boldsymbol{\lambda}, \mathbf{B}(\mathbf{y} - \mathbf{y}_{t+1}) \rangle \leq \langle \partial\phi(\mathbf{y}_{t+1}), \mathbf{y} - \mathbf{y}_{t+1} \rangle - \langle \boldsymbol{\lambda}, \mathbf{B}(\mathbf{y} - \mathbf{y}_{t+1}) \rangle,$$

which yields

$$\langle \mathbf{B}(\mathbf{y} - \mathbf{y}_{t+1}), \boldsymbol{\lambda}_{t+1} - \boldsymbol{\lambda} \rangle \leq \langle \mathbf{y} - \mathbf{y}_{t+1}, \partial\phi(\mathbf{y}_{t+1}) - \mathbf{B}^T \boldsymbol{\lambda} \rangle \leq R(L_2 + \|\mathbf{B}^T \boldsymbol{\lambda}\|_2), \tag{10}$$

where we have used the fact that  $\|\partial\phi(\mathbf{y}_{t+1})\|_2 \leq L_2$ .

Substituting (8)-(10) into (7), we then obtain

$$\begin{aligned}
 & \frac{1}{T} \sum_{t=1}^T (f_t(\mathbf{x}_t) + \phi(\mathbf{y}_t)) - \frac{1}{T} \sum_{t=1}^T (f_t(\mathbf{x}) + \phi(\mathbf{y})) + \frac{1}{T} \sum_{t=1}^T (\tilde{\mathbf{v}}_t - \mathbf{v})^T H(\tilde{\mathbf{v}}_t) \\
 & + \frac{1}{T} \sum_{t=1}^T \frac{\|\boldsymbol{\lambda}_{t+1} - \boldsymbol{\lambda}_t\|_2^2}{2\rho} \leq \frac{1}{T} \sum_{t=2}^T \max\left\{ \frac{\alpha}{2\eta_t} - \frac{\alpha}{2\eta_{t-1}} - \frac{\sigma}{2}, 0 \right\} R^2 + \frac{1}{T} \sum_{t=1}^T \frac{\eta_t}{2} \|\hat{\mathbf{g}}_t\|^2 + \frac{K}{T}, \tag{11}
 \end{aligned}$$

where  $K$  is a constant term related to  $\alpha$ ,  $R$ ,  $\eta_1$ ,  $\mathbf{A}$ ,  $\mathbf{B}$ ,  $\boldsymbol{\lambda}$ ,  $\rho$  and  $L_2$ ,  $K = \frac{\alpha R^2}{2\eta_1} + R\|\boldsymbol{\lambda}\|_2\|\mathbf{A}\|_F + \frac{1}{2\rho}\|\boldsymbol{\lambda}\|_2^2 + R\|\mathbf{B}\|_F\|\boldsymbol{\lambda}\|_2 + R(L_2 + \|\mathbf{B}^T\boldsymbol{\lambda}\|_2)$ , and we have used the fact that  $\|\hat{\mathbf{g}}_t\|_{\mathbf{G}_t^{-1}}^2 \leq \|\hat{\mathbf{g}}_t\|_2^2$  (due to  $\mathbf{G}_t^{-1} \preceq \mathbf{I}$ ).

Based on (11) we continue to prove Theorem 1. When  $\mathbf{B}$  is invertible and  $\mathbf{y}'_t = \mathbf{B}^{-1}(\mathbf{c} - \mathbf{A}\mathbf{x}_t)$ , we obtain

$$\mathbf{B}(\mathbf{y}'_t - \mathbf{y}_t) = \frac{1}{\rho}(\boldsymbol{\lambda}_t - \boldsymbol{\lambda}_{t-1}). \quad (12)$$

Based on the convexity of  $f$  and  $\phi$ , we obtain

$$\begin{aligned} f_t(\mathbf{x}_t) + \phi(\mathbf{y}'_t) &\leq f_t(\mathbf{x}_t) + \phi(\mathbf{y}_t) + \langle \partial\phi(\mathbf{y}'_t), \mathbf{y}'_t - \mathbf{y}_t \rangle \\ &= f_t(\mathbf{x}_t) + \phi(\mathbf{y}_t) + \frac{1}{\rho} \langle (\mathbf{B}^{-1})^T \partial\phi(\mathbf{y}'_t), \boldsymbol{\lambda}_t - \boldsymbol{\lambda}_{t-1} \rangle, \end{aligned} \quad (13)$$

where the last equality holds due to (12).

Let  $(\mathbf{x}^*, \mathbf{y}^*)$  be the optimal solution (implying  $\mathbf{A}\mathbf{x}^* + \mathbf{B}\mathbf{y}^* - \mathbf{c} = \mathbf{0}$ ). For any dual variable  $\boldsymbol{\lambda}^*$  and  $\tilde{\mathbf{v}}_t = [\mathbf{x}_t^T, \mathbf{y}_t^T, \tilde{\boldsymbol{\lambda}}_t^T]^T$ , we have

$$\begin{aligned} (\tilde{\mathbf{v}}_t - \mathbf{v}^*)^T H(\tilde{\mathbf{v}}_t) &= H(\mathbf{v}^*)^T (\tilde{\mathbf{v}}_t - \mathbf{v}^*) = \begin{bmatrix} -\mathbf{A}^T \boldsymbol{\lambda}^* \\ -\mathbf{B}^T \boldsymbol{\lambda}^* \\ \mathbf{A}\mathbf{x}^* + \mathbf{B}\mathbf{y}^* - \mathbf{c} \end{bmatrix}^T \begin{bmatrix} \mathbf{x}_t - \mathbf{x}^* \\ \mathbf{y}_t - \mathbf{y}^* \\ \tilde{\boldsymbol{\lambda}}_t - \boldsymbol{\lambda}^* \end{bmatrix} \\ &= \langle \boldsymbol{\lambda}^*, \mathbf{c} - \mathbf{A}\mathbf{x}_t - \mathbf{B}\mathbf{y}_t \rangle = \frac{1}{\rho} \langle \boldsymbol{\lambda}^*, \boldsymbol{\lambda}_t - \boldsymbol{\lambda}_{t-1} \rangle \end{aligned} \quad (14)$$

where  $\mathbf{v}^* := [(\mathbf{x}^*)^T, (\mathbf{y}^*)^T, (\boldsymbol{\lambda}^*)^T]^T$ , and the affine mapping  $H(\cdot)$  is given by (5).

Setting  $\boldsymbol{\lambda}^* = (\mathbf{B}^{-1})^T \partial\phi(\mathbf{y}'_t)$ , based on (13) and (14) we have

$$\begin{aligned} f_t(\mathbf{x}_t) + \phi(\mathbf{y}'_t) - (f_t(\mathbf{x}^*) + \phi(\mathbf{y}^*)) \\ \leq f_t(\mathbf{x}_t) + \phi(\mathbf{y}_t) + (\tilde{\mathbf{v}}_t - \mathbf{v}^*)^T H(\tilde{\mathbf{v}}_t) - (f_t(\mathbf{x}^*) + \phi(\mathbf{y}^*)). \end{aligned} \quad (15)$$

Combining (11) and (15) yields

$$\begin{aligned} &\frac{1}{T} \sum_{t=1}^T (f_t(\mathbf{x}_t) + \phi(\mathbf{y}'_t)) - \frac{1}{T} \sum_{t=1}^T (f_t(\mathbf{x}^*) + \phi(\mathbf{y}^*)) + \frac{1}{T} \sum_{t=1}^T \frac{\|\boldsymbol{\lambda}_{t+1} - \boldsymbol{\lambda}_t\|_2^2}{2\rho} \\ &\leq \frac{1}{T} \sum_{t=1}^T (f_t(\mathbf{x}_t) + \phi(\mathbf{y}_t)) - \frac{1}{T} \sum_{t=1}^T (f_t(\mathbf{x}^*) + \phi(\mathbf{y}^*)) + \frac{1}{T} \sum_{t=1}^T (\tilde{\mathbf{v}}_t - \mathbf{v}^*)^T H(\tilde{\mathbf{v}}_t) + \frac{1}{T} \sum_{t=1}^T \frac{\|\boldsymbol{\lambda}_{t+1} - \boldsymbol{\lambda}_t\|_2^2}{2\rho} \\ &\leq \frac{1}{T} \sum_{t=2}^T \max\left\{\frac{\alpha}{2\eta_t} - \frac{\alpha}{2\eta_{t-1}} - \frac{\sigma}{2}, 0\right\} R^2 + \frac{1}{T} \sum_{t=1}^T \frac{\eta_t}{2} \|\hat{\mathbf{g}}_t\|_2^2 + \frac{K}{T}. \end{aligned} \quad (16)$$

Since  $\boldsymbol{\lambda}_{t+1} - \boldsymbol{\lambda}_t = \rho(\mathbf{A}\mathbf{x}_{t+1} + \mathbf{B}\mathbf{y}_{t+1} - \mathbf{c})$ , from (16) we have

$$\begin{aligned} &\frac{1}{T} \sum_{t=1}^T (f_t(\mathbf{x}_t) + \phi(\mathbf{y}'_t)) - \frac{1}{T} \sum_{t=1}^T (f_t(\mathbf{x}^*) + \phi(\mathbf{y}^*)) + \frac{\rho}{2T} \sum_{t=1}^T \|\mathbf{A}\mathbf{x}_{t+1} + \mathbf{B}\mathbf{y}_{t+1} - \mathbf{c}\|_2^2 \\ &\leq \frac{1}{T} \sum_{t=2}^T \max\left\{\frac{\alpha}{2\eta_t} - \frac{\alpha}{2\eta_{t-1}} - \frac{\sigma}{2}, 0\right\} R^2 + \frac{1}{T} \sum_{t=1}^T \frac{\eta_t}{2} \|\hat{\mathbf{g}}_t\|_2^2 + \frac{K}{T}. \end{aligned} \quad (17)$$

Taking expectations for both sides of (17) with respect to its randomness, we have

$$\begin{aligned} &\mathbb{E} \left[ \frac{1}{T} \sum_{t=1}^T (f_t(\mathbf{x}_t) + \phi(\mathbf{y}'_t)) - \frac{1}{T} \sum_{t=1}^T (f_t(\mathbf{x}^*) + \phi(\mathbf{y}^*)) \right] + \mathbb{E} \left[ \frac{\rho}{2T} \sum_{t=1}^T \|\mathbf{A}\mathbf{x}_{t+1} + \mathbf{B}\mathbf{y}_{t+1} - \mathbf{c}\|_2^2 \right] \\ &\leq \frac{1}{T} \sum_{t=2}^T \max\left\{\frac{\alpha}{2\eta_t} - \frac{\alpha}{2\eta_{t-1}} - \frac{\sigma}{2}, 0\right\} R^2 + \frac{1}{T} \sum_{t=1}^T \frac{\eta_t}{2} \mathbb{E}[\|\hat{\mathbf{g}}_t\|_2^2] + \frac{K}{T}. \end{aligned} \quad (18)$$

Based on (Duchi et al., 2015, Lemma 1), the second-order statistics of the gradient estimate  $\hat{\mathbf{g}}_t$  is given by

$$\mathbb{E}_{\mathbf{z}_t}[\hat{\mathbf{g}}_t] = \mathbf{g}_t + \beta_t L_g(\mathbf{w}_t) \nu(\mathbf{x}_t, \beta_t), \quad (19)$$

$$\mathbb{E}_{\mathbf{z}_t}[\|\hat{\mathbf{g}}_t\|_2^2] \leq 2s(m)\|\mathbf{g}_t\|_2^2 + \frac{1}{2}\beta_t^2 L_g(\mathbf{w}_t)^2 M(\mu)^2, \quad (20)$$

where  $\mathbf{g}_t = \nabla_{\mathbf{x}} f(\mathbf{x}; \mathbf{w}_t)|_{\mathbf{x}=\mathbf{x}_t}$ ,  $\|\nu(\mathbf{x}_t, \beta_t)\|_2 \leq \frac{1}{2}\mathbb{E}_{\mathbf{z}}[\|\mathbf{z}\|_2^3]$ ,  $L_g(\mathbf{w}_t)$  is defined in Assumption C, and  $s(m)$  and  $M(\mu)$  are introduced in Assumption E. According to (20), we have

$$\begin{aligned} \mathbb{E}[\|\hat{\mathbf{g}}_t\|_2^2] &= \mathbb{E}[\mathbb{E}_{\mathbf{z}_t}[\|\hat{\mathbf{g}}_t\|_2^2]] \leq \mathbb{E}\left[2s(m)\|\mathbf{g}_t\|_2^2 + \frac{1}{2}\beta_t^2 L_{g,t}^2 M(\mu)^2\right] \\ &\leq 2s(m)L_1^2 + \frac{1}{2}\beta_t^2 L_g^2 M(\mu)^2, \end{aligned} \quad (21)$$

where for ease of notation, we have replaced  $L_g(\mathbf{w}_t)$  with  $L_{g,t}$ , and the last inequality holds due to Assumptions B and C.

Substituting (21) into (18), the expected average regret can be bounded as

$$\overline{\text{Regret}}_T(\mathbf{x}_t, \mathbf{y}'_t, \mathbf{x}^*, \mathbf{y}^*) \leq \frac{1}{T} \sum_{t=2}^T \max\left\{\frac{\alpha}{2\eta_t} - \frac{\alpha}{2\eta_{t-1}} - \frac{\sigma}{2}, 0\right\} R^2 + \frac{s(m)L_1^2}{T} \sum_{t=1}^T \eta_t + \frac{M(\mu)^2 L_g^2}{4T} \sum_{t=1}^T \eta_t \beta_t^2 + \frac{K}{T}. \quad (22)$$

On the other hand, when  $\mathbf{A}$  is invertible and  $\mathbf{x}'_t = \mathbf{A}^{-1}(\mathbf{c} - \mathbf{B}\mathbf{y}_t)$ , we obtain

$$\mathbf{A}(\mathbf{x}'_t - \mathbf{x}_t) = \frac{1}{\rho}(\boldsymbol{\lambda}_t - \boldsymbol{\lambda}_{t-1}).$$

Based on the convexity of  $f$  and  $\phi$ , we obtain

$$\begin{aligned} f_t(\mathbf{x}'_t) + \phi(\mathbf{y}_t) &\leq f_t(\mathbf{x}_t) + \phi(\mathbf{y}_t) + \langle \nabla f_t(\mathbf{x}'_t), \mathbf{x}'_t - \mathbf{x}_t \rangle \\ &= f_t(\mathbf{x}_t) + \phi(\mathbf{y}_t) + \frac{1}{\rho} \langle (\mathbf{A}^{-1})^T \nabla f_t(\mathbf{x}'_t), \boldsymbol{\lambda}_t - \boldsymbol{\lambda}_{t-1} \rangle. \end{aligned} \quad (23)$$

Setting  $\boldsymbol{\lambda}^* = (\mathbf{A}^{-1})^T \nabla f_t(\mathbf{x}'_t)$ , based on (23) and (14) we have

$$\begin{aligned} f_t(\mathbf{x}'_t) + \phi(\mathbf{y}_t) - (f_t(\mathbf{x}^*) + \phi(\mathbf{y}^*)) \\ \leq f_t(\mathbf{x}_t) + \phi(\mathbf{y}_t) + (\tilde{\mathbf{v}}_t - \mathbf{v}^*)^T H(\tilde{\mathbf{v}}_t) - (f_t(\mathbf{x}^*) + \phi(\mathbf{y}^*)). \end{aligned} \quad (24)$$

Since the right hand side (RHS) of (24) and RHS of (15) are same, we can then mimic the aforementioned procedure to prove that the regret  $\overline{\text{Regret}}_T(\mathbf{x}'_t, \mathbf{y}_t, \mathbf{x}^*, \mathbf{y}^*)$  obeys the same bounds as (22).

### 3 Simplification of Regret Bound

Consider terms in right hand side (RHS) of (22) together with  $\eta_t = \frac{C_1}{\sqrt{s(m)}\sqrt{t}}$  and  $\beta_t = \frac{C_2}{M(\mu)t}$ , we have

$$\begin{aligned} \frac{1}{T} \sum_{t=2}^T \max\left\{\frac{\alpha}{2\eta_t} - \frac{\alpha}{2\eta_{t-1}} - \frac{\sigma}{2}, 0\right\} R^2 &\leq \frac{1}{T} \sum_{t=2}^T \left(\frac{\alpha}{2\eta_t} - \frac{\alpha}{2\eta_{t-1}}\right) R^2 \leq \frac{1}{\sqrt{T}} \frac{\alpha R^2 \sqrt{s(m)}}{2C_1}, \\ \frac{s(m)L_1^2}{T} \sum_{t=1}^T \eta_t &\leq \frac{2C_1 \sqrt{s(m)} L_1^2}{\sqrt{T}}, \\ \frac{M(\mu)^2 L_g^2}{4T} \sum_{t=1}^T \eta_t \beta_t^2 &= \frac{C_1 C_2^2 L_g^2}{4\sqrt{s(m)}T} \sum_{t=1}^T \frac{1}{t^{5/2}} \leq \frac{5C_1 C_2^2 L_g^2}{12T}, \end{aligned} \quad (25)$$

where we have used the facts that  $\sum_{t=1}^T \frac{1}{\sqrt{t}} \leq 2\sqrt{T}$ ,

$$\sum_{t=1}^T (1/t^a) = 1 + \sum_{t=2}^T (1/t^a) \leq 1 + \int_1^\infty (1/t^a) = a/(a-1), \quad \forall a > 1, \quad (26)$$

and we recall that  $s(m) = m \geq 1$ . Substituting (25) into RHS of (22), we conclude that the expected average regret  $\overline{\text{Regret}}_T(\mathbf{x}_t, \mathbf{y}'_t, \mathbf{x}^*, \mathbf{y}^*)$  is upper bounded by

$$\frac{1}{\sqrt{T}} \frac{\alpha R^2 \sqrt{s(m)}}{2C_1} + \frac{2C_1 \sqrt{s(m)} L_1^2}{\sqrt{T}} + \frac{5C_1 C_2^2 L_g^2}{12T} + \frac{K}{T}. \quad (27)$$

## 4 Proof of Corollary 1

Given i.i.d. samples  $\{\mathbf{w}_t\}$  drawn from the probability distribution  $P$ , from Theorem 1 we have

$$\begin{aligned} & \mathbb{E} \left[ \frac{1}{T} \sum_{t=1}^T (f(\mathbf{x}_t; \mathbf{w}_t) + \phi(\mathbf{y}'_t)) - \frac{1}{T} \sum_{t=1}^T (f(\mathbf{x}^*; \mathbf{w}_t) + \phi(\mathbf{y}^*)) \right] \\ & \leq \frac{1}{\sqrt{T}} \frac{\alpha R^2 \sqrt{s(m)}}{2C_1} + \frac{2C_1 \sqrt{s(m)} L_1^2}{\sqrt{T}} + \frac{5C_1 C_2^2 L_g^2}{12} \frac{1}{T} + \frac{K}{T}. \end{aligned} \quad (28)$$

Based on  $F(\mathbf{x}, \mathbf{y}) = \mathbb{E}_{\mathbf{w}}[f(\mathbf{x}; \mathbf{w})] + \phi(\mathbf{y})$ , from (28) we have

$$\begin{aligned} & \mathbb{E} [F(\bar{\mathbf{x}}_t, \bar{\mathbf{y}}_t) - F(\mathbf{x}^*, \mathbf{y}^*)] \leq \mathbb{E} \left[ \frac{1}{T} \sum_{t=1}^T F(\mathbf{x}_t, \mathbf{y}_t) - F(\mathbf{x}^*, \mathbf{y}^*) \right] \\ & = \mathbb{E}_{\mathbf{z}_{1:T}} \left[ \mathbb{E}_{\mathbf{w}_{1:T}} \left[ \frac{1}{T} \sum_{t=1}^T (f(\mathbf{x}_t; \mathbf{w}_t) + \phi(\mathbf{y}'_t)) - \frac{1}{T} \sum_{t=1}^T (f(\mathbf{x}^*; \mathbf{w}_t) + \phi(\mathbf{y}^*)) \right] \right] \\ & \leq \frac{1}{\sqrt{T}} \frac{\alpha R^2 \sqrt{s(m)}}{2C_1} + \frac{2C_1 \sqrt{s(m)} L_1^2}{\sqrt{T}} + \frac{5C_1 C_2^2 L_g^2}{12} \frac{1}{T} + \frac{K}{T}, \end{aligned} \quad (29)$$

where the first inequality holds due to the convexity of  $F$ , and the second equality holds since  $\mathbf{x}_t$  and  $\mathbf{y}_t$  are implicit functions of i.i.d. random variables  $\{\mathbf{w}_k\}_{k=1}^{t-1}$  and  $\{\mathbf{z}_k\}_{k=1}^{t-1}$ , and  $\{\mathbf{w}_t\}$  and  $\{\mathbf{z}_t\}$  are independent of each other.

## 5 Proof of Corollary 2

Substituting  $\eta_t = \frac{\alpha}{\sigma t}$  and  $\beta_t = \frac{C_2}{M(\mu)^t}$  into RHS of (22), we have

$$\begin{aligned} & \frac{1}{T} \sum_{t=2}^T \max \left\{ \frac{\alpha}{2\eta_t} - \frac{\alpha}{2\eta_{t-1}} - \frac{\sigma}{2}, 0 \right\} R^2 = 0, \quad \frac{s(m) L_1^2}{T} \sum_{t=1}^T \eta_t \leq \frac{\alpha s(m) L_1^2 \log T}{\sigma T}, \\ & \frac{M(\mu)^2 L_g^2}{4T} \sum_{t=1}^T \eta_t \beta_t^2 = \frac{\alpha C_2^2 L_g^2}{4\sigma T} \sum_{t=1}^T \frac{1}{t^3} \leq \frac{3\alpha C_2^2 L_g^2}{8\sigma T}, \end{aligned} \quad (30)$$

where we have used the facts that  $\sum_{t=1}^T \frac{1}{t} \leq 1 + \log T$  and (26). Based on (30) and (27), we complete the proof.

## 6 Proof of Corollary 3

We consider the hybrid minibatch strategy

$$\hat{\mathbf{g}}_t = \frac{1}{q_1 q_2} \sum_{j=1}^{q_1} \sum_{i=1}^{q_2} \frac{f(\mathbf{x}_t + \beta_t \mathbf{z}_{t,j}; \mathbf{w}_{t,i}) - f(\mathbf{x}_t; \mathbf{w}_{t,i})}{\beta_t} \mathbf{z}_{t,j} \quad (31)$$

with  $\hat{\mathbf{g}}_{t,ij} := \frac{f(\mathbf{x}_t + \beta_t \mathbf{z}_{t,j}; \mathbf{w}_{t,i}) - f(\mathbf{x}_t; \mathbf{w}_{t,i})}{\beta_t} \mathbf{z}_{t,j}$ . Based on (19) and i.i.d. samples  $\{\mathbf{w}_{t,i}\}$  and  $\{\mathbf{z}_{t,j}\}$ , we have

$$\bar{\mathbf{g}}_t := \mathbb{E}[\hat{\mathbf{g}}_{t,ij}] = \mathbb{E}[\mathbf{g}_t] + \beta_t \mathbb{E}[L_{g,t} \nu(\mathbf{x}_t, \beta_t)], \quad \forall i, j. \quad (32)$$

where for ease of notation we have replaced  $L_g(\mathbf{w}_t)$  with  $L_{g,t}$ ,  $\|\nu(\mathbf{x}_t, \beta_t)\|_2 \leq \frac{1}{2}\mathbb{E}[\|\mathbf{z}\|_2^3] \leq M(\mu)$  due to Assumption E. From (31), we obtain

$$\begin{aligned} \mathbb{E}[\|\hat{\mathbf{g}}_t\|_2^2] &= \mathbb{E}\left[\left\|\frac{1}{q_1 q_2} \sum_{i=1}^{q_1} \sum_{j=1}^{q_2} (\hat{\mathbf{g}}_{t,ij} - \bar{\mathbf{g}}_t) + \bar{\mathbf{g}}_t\right\|_2^2\right] = \|\bar{\mathbf{g}}_t\|_2^2 + \mathbb{E}\left[\left\|\frac{1}{q_1 q_2} \sum_{i=1}^{q_1} \sum_{j=1}^{q_2} (\hat{\mathbf{g}}_{t,ij} - \bar{\mathbf{g}}_t)\right\|_2^2\right] \\ &= \|\bar{\mathbf{g}}_t\|_2^2 + \frac{1}{q_1 q_2} \mathbb{E}[\|\hat{\mathbf{g}}_{t,11} - \bar{\mathbf{g}}_t\|_2^2] = \|\bar{\mathbf{g}}_t\|_2^2 + \frac{1}{q_1 q_2} \mathbb{E}[\|\hat{\mathbf{g}}_{t,11}\|_2^2] - \frac{1}{q_1 q_2} \|\bar{\mathbf{g}}_t\|_2^2, \end{aligned} \quad (33)$$

where we have used the fact that  $\mathbb{E}[\hat{\mathbf{g}}_{t,ij}] = \mathbb{E}[\hat{\mathbf{g}}_{t,11}]$  for any  $i$  and  $j$ .

The definition of  $\bar{\mathbf{g}}_t$  in (32) yields

$$\begin{aligned} \|\bar{\mathbf{g}}_t\|_2^2 &\leq 2\|\mathbb{E}[\mathbf{g}_t]\|_2^2 + 2\|\beta_t \mathbb{E}[L_{g,t} \nu(\mathbf{x}_t, \beta_t)]\|_2^2 \\ &\leq 2\mathbb{E}[\|\mathbf{g}_t\|_2^2] + 2\beta_t^2 \mathbb{E}[L_{g,t}^2] \mathbb{E}[\|\nu(\mathbf{x}_t, \beta_t)\|_2^2] \leq 2\mathbb{E}[\|\mathbf{g}_t\|_2^2] + \frac{1}{2}\beta_t^2 L_g^2 M(\mu)^2, \end{aligned} \quad (34)$$

where the first inequality holds due to Cauchy-Schwarz inequality, and the second inequality holds due to Jensen's inequality. From (20), we obtain

$$\mathbb{E}[\|\hat{\mathbf{g}}_{t,11}\|_2^2] \leq 2s(m)\mathbb{E}[\|\mathbf{g}_t\|_2^2] + \frac{1}{2}\beta_t^2 L_g^2 M(\mu)^2. \quad (35)$$

Substituting (34) and (35) into (33), we obtain

$$\mathbb{E}[\|\hat{\mathbf{g}}_t\|_2^2] \leq \|\bar{\mathbf{g}}_t\|_2^2 + \frac{1}{q_1 q_2} \mathbb{E}[\|\hat{\mathbf{g}}_{t,11}\|_2^2] \leq 2\left(1 + \frac{s(m)}{q_1 q_2}\right) \mathbb{E}[\|\mathbf{g}_t\|_2^2] + \frac{q_1 q_2 + 1}{2q_1 q_2} \beta_t^2 L_g^2 M(\mu)^2. \quad (36)$$

Similar to proof of Theorem 1, substituting (36) into (18), we obtain

$$\begin{aligned} \overline{\text{Regret}}_T(\mathbf{x}_t, \mathbf{y}'_t, \mathbf{x}^*, \mathbf{y}^*) &\leq \frac{1}{T} \sum_{t=2}^T \max\left\{\frac{\alpha}{2\eta_t} - \frac{\alpha}{2\eta_{t-1}} - \frac{\sigma}{2}, 0\right\} R^2 + \frac{1}{T} \sum_{t=1}^T \frac{\eta_t}{2} \mathbb{E}[\|\hat{\mathbf{g}}_t\|_2^2] + \frac{K}{T} \\ &\leq \frac{1}{T} \sum_{t=2}^T \max\left\{\frac{\alpha}{2\eta_t} - \frac{\alpha}{2\eta_{t-1}} - \frac{\sigma}{2}, 0\right\} R^2 + \frac{(q_1 q_2 + s(m))L_1^2}{q_1 q_2 T} \sum_{t=1}^T \eta_t \\ &\quad + \frac{(q_1 q_2 + 1)L_g^2 M(\mu)^2}{4q_1 q_2 T} \sum_{t=1}^T \eta_t \beta_t^2 + \frac{K}{T}. \end{aligned} \quad (37)$$

Substituting  $\eta_t = \frac{C_1}{\sqrt{1 + \frac{s(m)}{q_1 q_2}} \sqrt{t}}$  and  $\beta_t = \frac{C_2}{M(\mu)t}$  into (37), we obtain

$$\begin{aligned} \overline{\text{Regret}}_T(\mathbf{x}_t, \mathbf{y}'_t, \mathbf{x}^*, \mathbf{y}^*) &\leq \frac{\alpha R^2}{2C_1} \frac{\sqrt{1 + \frac{s(m)}{q_1 q_2}}}{\sqrt{T}} + 2C_1 L_1^2 \frac{\sqrt{1 + \frac{s(m)}{q_1 q_2}}}{\sqrt{T}} + \frac{5C_1 C_2^2 L_g^2}{12T} \frac{q_1 q_2 + 1}{q_1 q_2 \sqrt{1 + \frac{s(m)}{q_1 q_2}}} + \frac{K}{T} \\ &\leq \frac{\alpha R^2}{2C_1} \frac{\sqrt{1 + \frac{s(m)}{q_1 q_2}}}{\sqrt{T}} + 2C_1 L_1^2 \frac{\sqrt{1 + \frac{s(m)}{q_1 q_2}}}{\sqrt{T}} + \frac{5C_1 C_2^2 L_g^2}{6} \frac{1}{T} + \frac{K}{T}, \end{aligned} \quad (38)$$

which then completes the proof.

## 7 ZOO-ADMM for Sensor Selection

We recall that the sensor selection problem can be cast as

$$\begin{aligned} \underset{\mathbf{x}, \mathbf{y}}{\text{minimize}} \quad & \frac{1}{T} \sum_{t=1}^T f(\mathbf{x}; \mathbf{w}_t) + \mathcal{I}_1(\mathbf{x}) + \mathcal{I}_2(\mathbf{y}) \\ \text{subject to} \quad & \mathbf{x} - \mathbf{y} = \mathbf{0}, \end{aligned} \quad (39)$$

where  $\mathbf{y} \in \mathbb{R}^m$  is an auxiliary variable,  $f(\mathbf{x}; \mathbf{w}_t) = -\log\det(\sum_{i=1}^m x_i \mathbf{a}_i \mathbf{a}_i^T)$  with  $\mathbf{w}_t = \{\mathbf{a}_{i,t}\}_{i=1}^m$ , and  $\{\mathcal{I}_i\}$  are indicator functions

$$\mathcal{I}_1(\mathbf{x}) = \begin{cases} 0 & \mathbf{0} \leq \mathbf{x} \leq \mathbf{1} \\ \infty & \text{otherwise,} \end{cases} \quad \mathcal{I}_2(\mathbf{y}) = \begin{cases} 0 & \mathbf{1}^T \mathbf{y} = m_0 \\ \infty & \text{otherwise.} \end{cases}$$

Based on (39), two key steps of ZOO-ADMM (2)-(3) are given by

$$\mathbf{x}_{t+1} = \arg \min_{\mathbf{0} \leq \mathbf{x} \leq \mathbf{1}} \left\{ \|\mathbf{x} - \mathbf{d}_t\|_2^2 \right\}, \quad (40)$$

$$\mathbf{y}_{t+1} = \arg \min_{\mathbf{1}^T \mathbf{y} = m_0} \left\{ \|\mathbf{y} - (\mathbf{x}_{t+1} - (1/\rho)\boldsymbol{\lambda}_t)\|_2^2 \right\}, \quad (41)$$

where  $\hat{\mathbf{g}}_t$  is the gradient estimate, and  $\mathbf{d}_t := \frac{\eta_t}{\alpha} (-\hat{\mathbf{g}}_t + \boldsymbol{\lambda}_t - \rho \mathbf{x}_t + \rho \mathbf{y}_t) + \mathbf{x}_t$ . Sub-problems (40) and (41) yield closed-form solutions as below (Parikh and Boyd, 2014)

$$[\mathbf{x}_{t+1}]_i = \begin{cases} 0 & [\mathbf{d}_t]_i < 0 \\ [\mathbf{d}_t]_i & [\mathbf{d}_t]_i \in [0, 1] \\ 1 & [\mathbf{d}_t]_i > 1, \end{cases} \quad \text{and} \quad (42)$$

$$\mathbf{y}_{t+1} = \mathbf{x}_{t+1} - \frac{1}{\rho} \boldsymbol{\lambda}_t + \frac{m_0 - \mathbf{1}^T (\mathbf{x}_{t+1} - \boldsymbol{\lambda}_t / \rho)}{m} \mathbf{1}_m, \quad (43)$$

where  $[\mathbf{x}]_i$  denote the  $i$ th entry of  $\mathbf{x}$ .

## 8 ZOO-ADMM for Sparse Cox Regression

This sparse regression problem can be formulated as

$$\begin{aligned} & \underset{\mathbf{x}, \mathbf{y}}{\text{minimize}} && \frac{1}{n} \sum_{i=1}^n f(\mathbf{x}; \mathbf{w}_i) + \gamma \|\mathbf{y}\|_1 \\ & \text{subject to} && \mathbf{x} - \mathbf{y} = \mathbf{0}, \end{aligned} \quad (44)$$

where  $f(\mathbf{x}; \mathbf{w}_i) = \delta_i \left\{ -\mathbf{a}_i^T \mathbf{x} + \log \left( \sum_{j \in \mathcal{R}_i} e^{\mathbf{a}_j^T \mathbf{x}} \right) \right\}$  with  $\mathbf{w}_i = \mathbf{a}_i$ . By using the ZOO-ADMM algorithm, we can avoid the gradient calculation for the involved objective function in Cox regression. The two key steps of ZOO-ADMM (2)-(3) at iteration  $i$  become

$$\mathbf{x}_{i+1} = \frac{\eta_t}{\alpha} (-\hat{\mathbf{g}}_i + \boldsymbol{\lambda}_i - \rho \mathbf{x}_i + \rho \mathbf{y}_i) + \mathbf{x}_i, \quad (45)$$

$$\mathbf{y}_{i+1} = \arg \min_{\mathbf{y}} \left\{ \|\mathbf{y}\|_1 + \frac{\rho}{2\gamma} \|\mathbf{y} - \mathbf{d}_i\|_2^2 \right\}, \quad (46)$$

where  $\hat{\mathbf{g}}_i$  is the gradient estimate,  $\mathbf{d}_i = (\mathbf{x}_{i+1} - (1/\rho)\boldsymbol{\lambda}_i)$ , and the solution of sub-problem (46) is given by the soft-thresholding operator at the point  $\mathbf{d}_i$  with parameter  $\rho/\gamma$  (Parikh and Boyd, 2014, Sec. 6)

$$[\mathbf{y}_{i+1}]_k = \begin{cases} (1 - \frac{\gamma}{\rho|[\mathbf{d}_i]_k|})[\mathbf{d}_i]_k & [\mathbf{d}_i]_k > \frac{\gamma}{\rho} \\ 0 & [\mathbf{d}_i]_k \leq \frac{\gamma}{\rho}, \end{cases} \quad k = 1, 2, \dots, m.$$

## References

- S. Bubeck et al. Convex optimization: Algorithms and complexity. *Foundations and Trends® in Machine Learning*, 8(3-4):231–357, 2015.
- J. C. Duchi, M. I. Jordan, M. J. Wainwright, and A. Wibisono. Optimal rates for zero-order convex optimization: The power of two function evaluations. *IEEE Transactions on Information Theory*, 61(5):2788–2806, 2015.
- E. Hazan. Introduction to online convex optimization. *Foundations and Trends® in Optimization*, 2(3-4):157–325, 2016.
- N. Parikh and S. Boyd. Proximal algorithms. *Foundations and Trends® in Optimization*, 1(3):127–239, 2014.
- T. Suzuki. Dual averaging and proximal gradient descent for online alternating direction multiplier method. *International Conference on Machine Learning*, pages 392–400, 2013.
